# Supplementary material for: Methyl substitution for noncentrosymmetric stacking: a promising organic single crystal for highly efficient terahertz-wave generation
Source: Royal Society of Chemistry journal article supplement (doi:10.1039/d0tc00408a), 2020-01-01
Supplement: d0tc00408a1.pdf [file d0tc00408a1.pdf]

## Supporting Information

### **Methyl Made Noncentrosymmetric Stacking: A Promising Organic Single Crystal for Highly Efficient Terahertz-wave Generation**

Jingkai Shi, Yixin He, Fei Liang, Xinyuan Zhang,\* Degang Xu, Jiyong Yao, Guochun Zhang, Zhanggui Hu, Jianquan Yao, and Yicheng Wu

*<sup>a</sup>Tianjin Key Laboratory of Functional Crystal Materials, Institute of Functional Crystals, Tianjin University of Technology, Tianjin 300384, China.*

*Email: xyzhang@email.tjut.edu.cn*

*<sup>b</sup>The Institute of Laser & Optoelectronics, College of Precision Instruments and Optoelectronics Engineering, Tianjin University, Tianjin 300072, China.*

*<sup>c</sup>Key Laboratory of Optoelectronic Information Technology (Ministry of Education), Tianjin University, Tianjin 300072, China.*

*<sup>d</sup>State Key Laboratory of Crystal Materials and Institute of Crystal Materials, Shandong University, Jinan 250100, China.*

*<sup>e</sup>Key Laboratory of Functional Crystals and Laser Technology, Beijing Center for Crystal Research and Development, Technical Institute of Physics and Chemistry, Chinese Academy of Sciences, Beijing 100190, China.*

## 1. Supplementary figures.

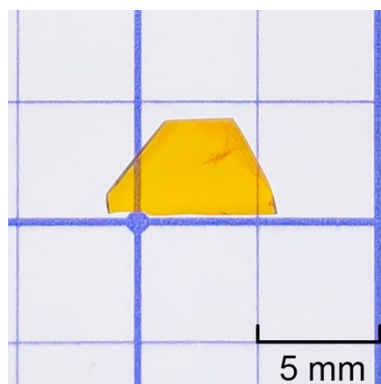

**Figure S1.** OHI-T single crystal grown from methanol solvent.

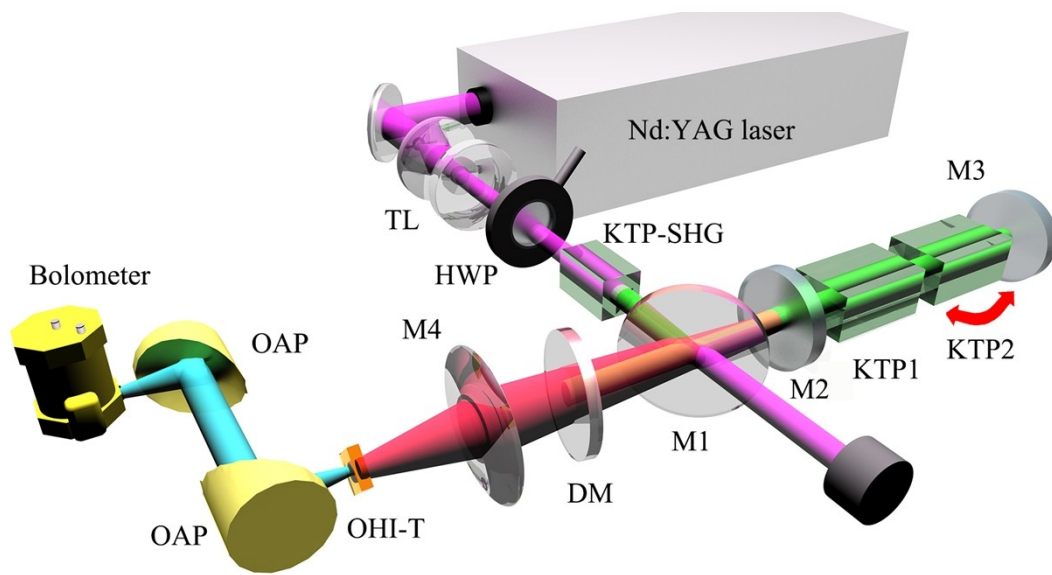

**Figure S2.** Schematic diagram of the experimental setup for THz wave output.

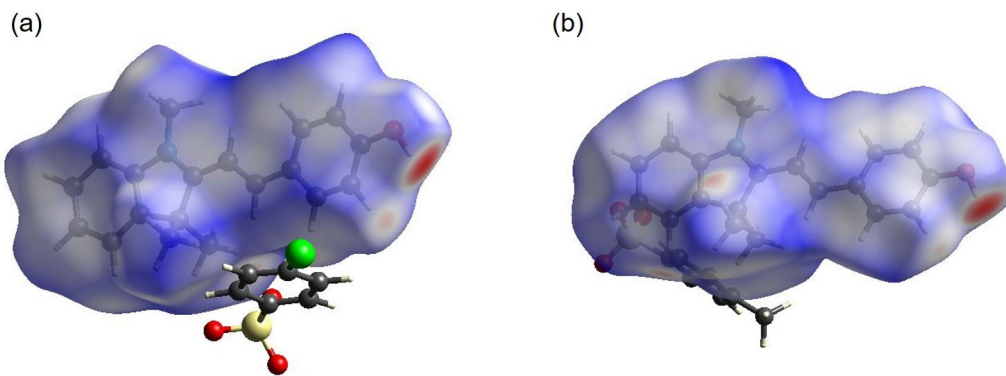

**Figure S3.** Hirshfeld surfaces of (a) OHI-CBS and (b) OHI-T.

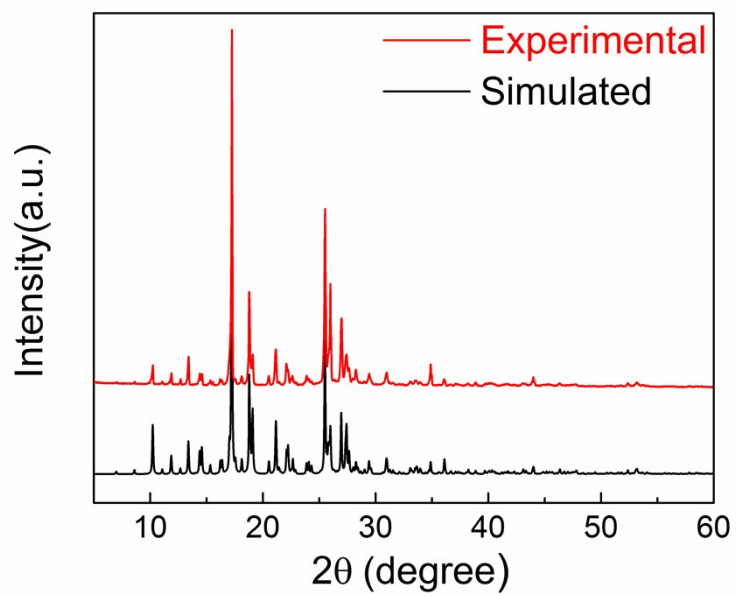

**Figure S4.** Simulated (black), experimental (red) PXR D patterns of OHI-CBS.

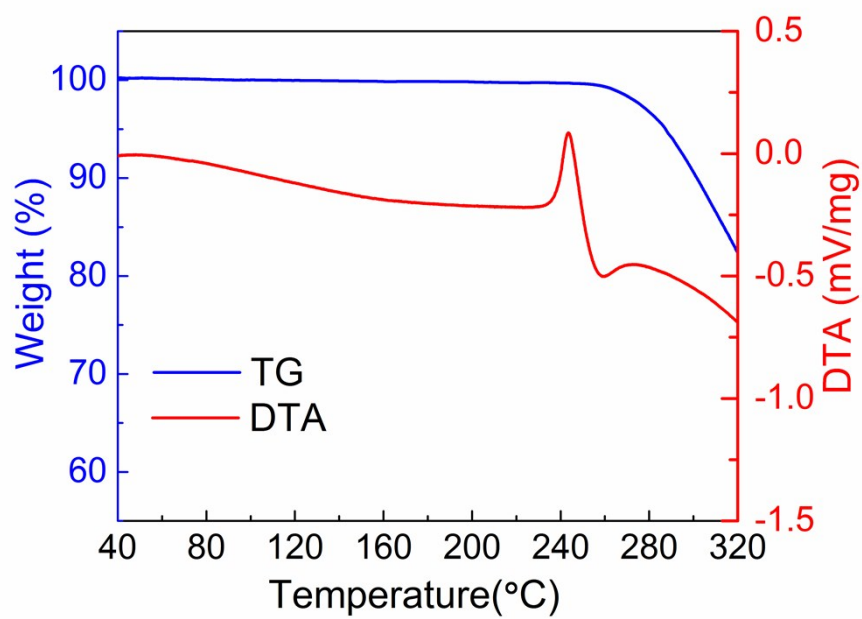

**Figure S5.** TG and DTA curves of OHI-CBS crystals.

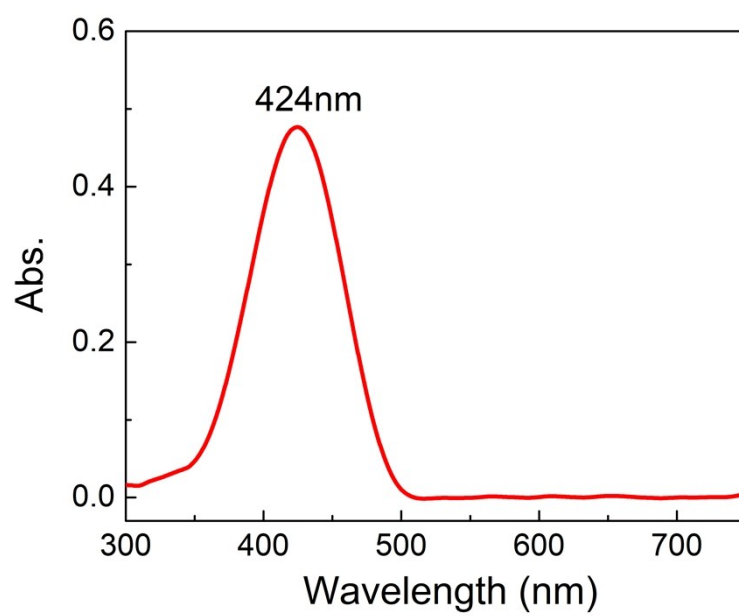

**Figure S6.** UV-vis spectra of OHI-T in acetonitrile.

## 2. Supplementary tables.

**Table S1.** Comparison of mentioned organic NLO crystals.

| Series           | Crystal Name | Chemical Structure                                                                   | Space Group  | NLO Coefficients/<br>SHG Intensity       | Cut-off Wavelengths | THz-wave Generation | Ref.       |
|------------------|--------------|--------------------------------------------------------------------------------------|--------------|------------------------------------------|---------------------|---------------------|------------|
|                  | DAST         | 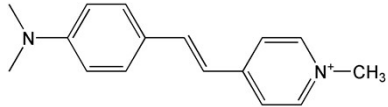   | <i>Cc</i>    | $d_{11} = 210$ pm/V at 1.9 $\mu\text{m}$ | 680 nm              | DFG: 0.3-19.6 THz   | 8, 9, 46   |
| Pyridinium-based | DSTMS        |    | <i>Cc</i>    | $d_{11} = 214$ pm/V at 1.9 $\mu\text{m}$ | -                   | DFG: 0.88-19.27 THz | 9, 47      |
| Isophorone-based | OH1          |  | <i>Pna21</i> | $d_{33} = 120$ pm/V at 1.9 $\mu\text{m}$ | 640 nm              | DFG: 0.02 - 20 THz  | 10, 11, 45 |



|                   |         |                                                                                     |                          |                                  |        |                                      |        |
|-------------------|---------|-------------------------------------------------------------------------------------|--------------------------|----------------------------------|--------|--------------------------------------|--------|
| Nitraniline-based | BNA     | 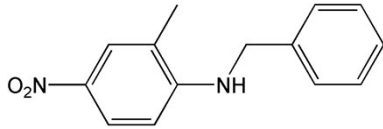  | <i>Pna</i> <sub>21</sub> | $d_{33} = 234$ pm/V at 1064 nm   | -      | DFG: 0.1-15 THz                      | 12     |
| Isoxazolone-based | MLS     |   | <i>Pna</i> <sub>21</sub> | $1.5 \times$ OH1 at 2.09 $\mu$ m | 470 nm | DFG: 1.23-14.09 THz, 16.90-18.59 THz | 20, 21 |
| Quinolinium-based | HMQ-TMS |   | <i>Pn</i>                | -                                | 595 nm | OR: ~ 6 THz                          | 15     |
|                   | HMQ-T   |  | <i>Pn</i>                | $0.6 \times$ DAST at 1.9 $\mu$ m | 595 nm | OR: ~ 2 THz                          | 14     |

---

HM7CIQ-  
CBS

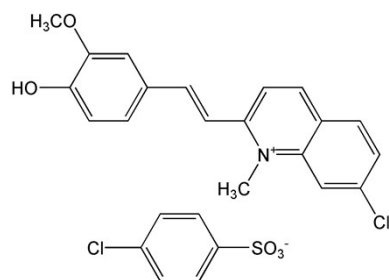

*Pna*2<sub>1</sub>

Comparable to HMQ-  
T at 1400 nm

-

OR: ~ 8 THz

16

HM7CIQ-T

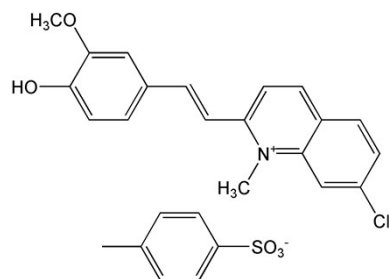

*Pna*2<sub>1</sub>

Comparable to HMQ-  
T at 1400 nm

-

OR: ~ 8 THz

16

OHQ-T

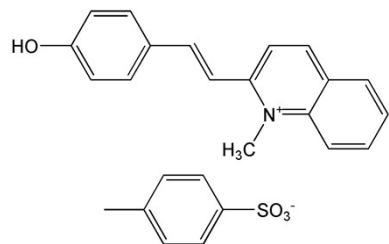

*Pn*

Comparable to  
DAST at 1253 nm

510 nm

OR: ~ 10 THz

17

OHQ-CBS

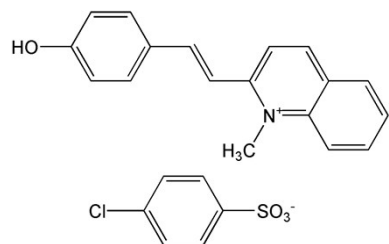

*P1*

-

550 nm

OR: ~ 9 THz

18

---

---

OHQ-N2S

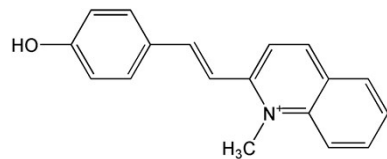

*Pn*

Comparable to  
DAST at 1253 nm

490 nm

OR: ~ 6 THz

19

OHQ-TFO

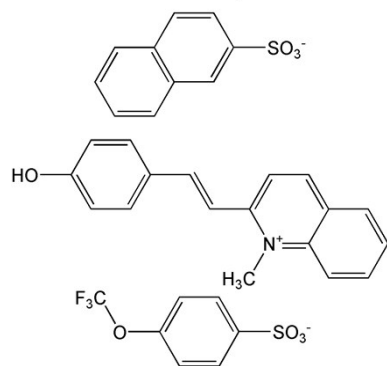

*Pc*

2.3 × OHQ-T  
1140 nm

at 610 nm

OR: ~ 8 THz

13

---

Benzothiazolium-  
based

HMB-TMS

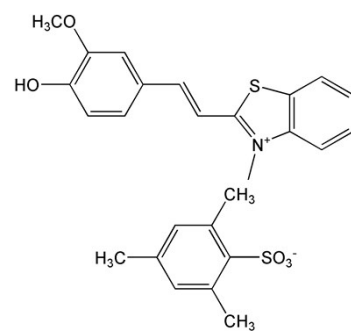

*Pn*

Comparable to  
DAST at 1250 nm

580 nm

OR: ~ 5.3 THz

22

---

|                |  |                       |                                  |        |                     |              |
|----------------|--|-----------------------|----------------------------------|--------|---------------------|--------------|
| PMB-T          |  | <i>Cc</i>             | Comparable to<br>DAST at 1800 nm | 680 nm | OR: ~ 8.0 THz       | 23           |
| HDB-T          |  | <i>P2<sub>1</sub></i> | 1.5 × OH1 at 2.09 μm             | -      | DFG:<br>0.1-20 THz  | 24           |
| EHPSI-4NBS     |  | <i>Pn</i>             | -                                | -      | OR: ~3.8 THz        | 32           |
| Indolium-based |  | <i>Cc</i>             | 0.7 × OH1 at 2.09 μm             | 504 nm | DFG:<br>0.1- 20 THz | This<br>work |

---

UOH1

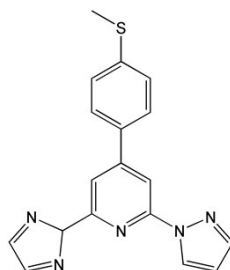

*I*4<sub>1</sub>

3.3× urea at 800 nm -

OR: ~ 2.2 THz 25

PhMDA

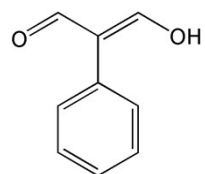

*P*na2<sub>1</sub> -

-

OR: ~ 2 THz 26

---
